# Supplementary material for: Starch Bio-Synthetic Pathway Genes Contribute to Resistant Starch Content Differentiation in Bread Wheat
Source: MDPI journal article supplement (doi:10.3390/agronomy12122967), 2022-11-25
Supplement: s1 [file s1]

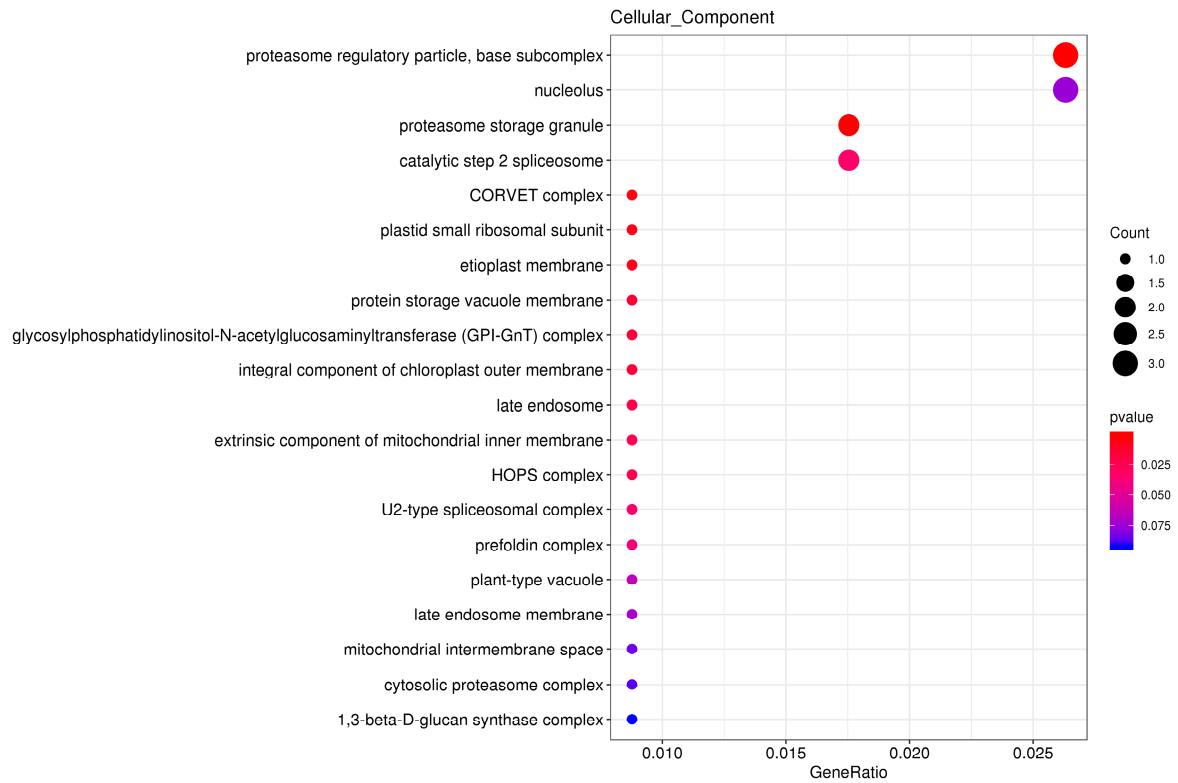

**Figure S1.** GO enrichment of 171 genes in the integrated QTL regions-Cellular Component.

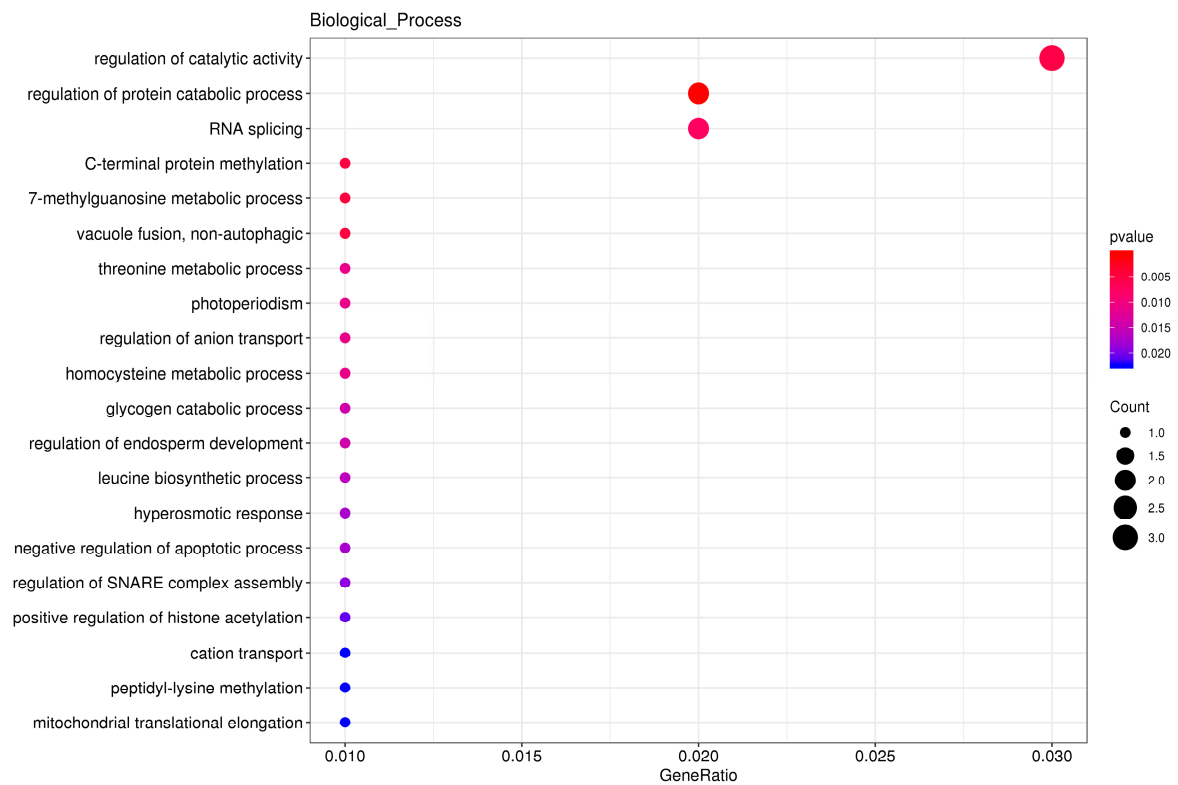

**Figure S2.** GO enrichment of 171 genes in the integrated QTL regions-Biological Process.

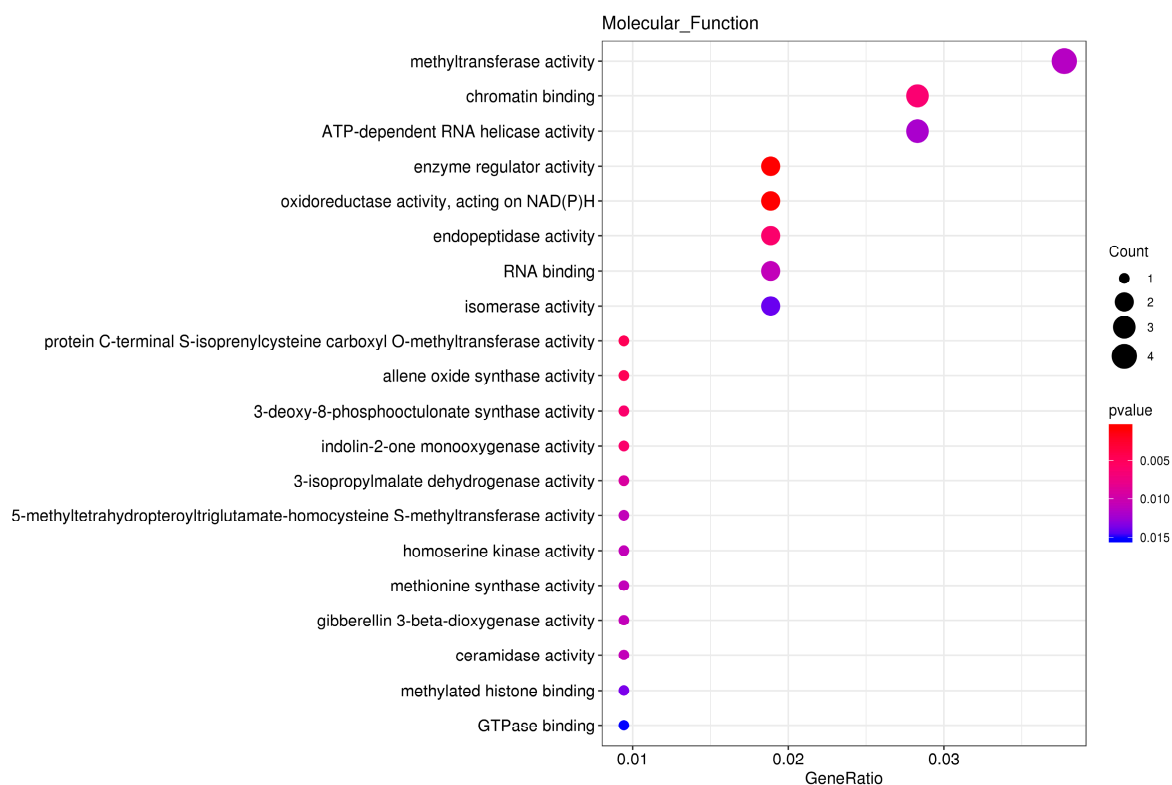

**Figure S3.** GO enrichment of 171 genes in the integrated QTL regions-Molecular Function.

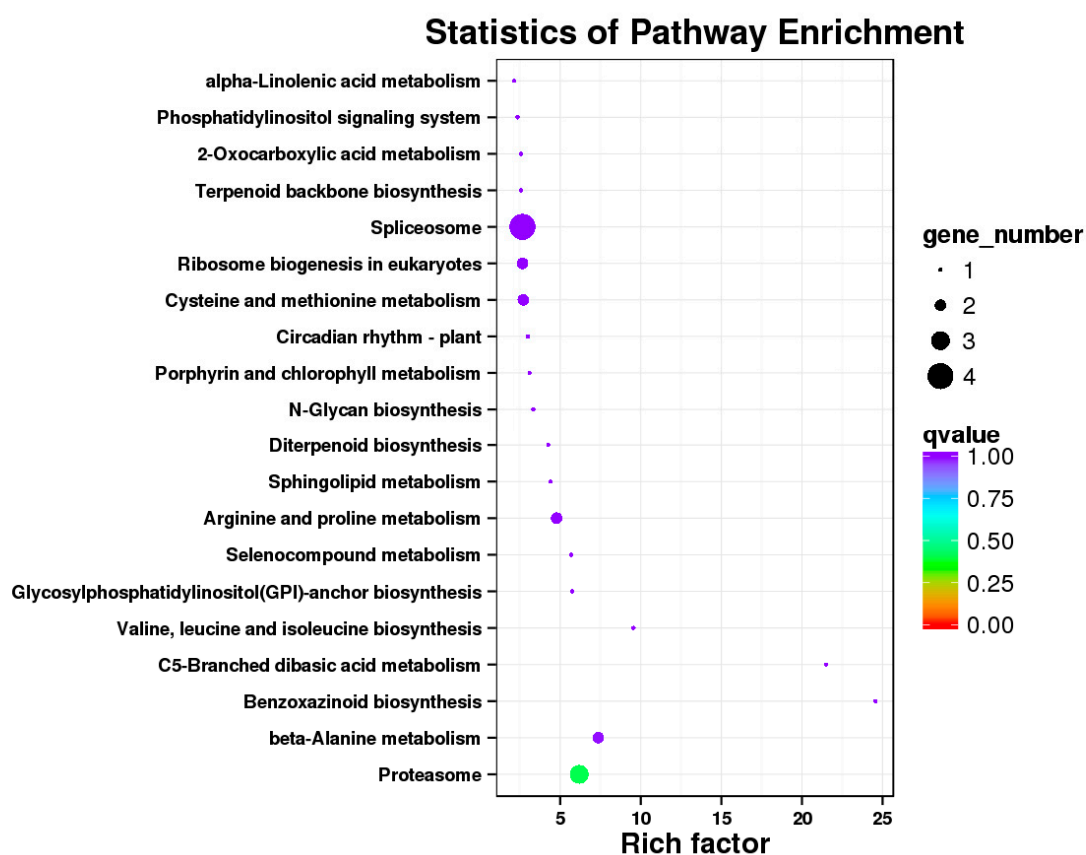

**Figure S4.** KEGG enrichment of 171 genes in the integrated QTL regions.
